# Supplementary material
Source: PubMed Central journal article supplement (PMC7781065)
Supplement: NIHMS1640606-supplement-9.pdf [file NIHMS1640606-supplement-9.pdf]

**Table S1. Common driver lines and their corresponding t-types, related to Figure 1.** Cell counts from driver lines used both in this study and Tasic et al. (2018). Dissociated cells from Tasic et al. (2018): left, Patch-seq cells from this study; right. Only Patch-seq cells with highly-consistent mapping are included.

| t-type                | Chat-IRES-Cre-neo | Chma2-Cre_OE25 | Ch-IRES-Cre_ZfH; Sst-IRES-FloP | Etv1-CreERT2; Pvalb-T2A-FloP | Hrf3a-Cre_N0152 | Hrf3a-Cre_N0152; Sst-IRES-FloP | Ndnf-IRES2-4gCre | Ndnf-IRES2-4gCre; Slc32a1-IRES2-FloP | Nkx2-1-CreERT2 | Nost1-CreERT2 | Nost1-CreERT2; Sst-IRES-FloP | Oxlr-T2A-Cre | Oxlr-T2A-Cre; Pvalb-T2A-FloP | Pdyn-T2A-CreERT2 | Pvalb-IRES-Cre | Slc17a8-Cre | Slc17a8-IRES2-Cre | Slc17a8-IRES2-Cre; Slc32a1-IRES2-FloP | Sst-IRES-Cre | Tact1-IRES2-Cre; Sst-IRES-FloP | Th-Cre_FH172 | Vip-IRES-Cre | Vipr2-IRES2-Cre | Vipr2-IRES2-Cre; Pvalb-T2A-FloP | Vipr2-IRES2-Cre; Slc32a1-T2A-FloP |
|-----------------------|-------------------|----------------|--------------------------------|------------------------------|-----------------|--------------------------------|------------------|--------------------------------------|----------------|---------------|------------------------------|--------------|------------------------------|------------------|----------------|-------------|-------------------|---------------------------------------|--------------|--------------------------------|--------------|--------------|-----------------|---------------------------------|-----------------------------------|
| Lamp5 Krt73           | 1                 | 0              | 0                              | 0                            | 0               | 0                              | 0                | 0                                    | 0              | 0             | 0                            | 0            | 0                            | 0                | 0              | 0           | 7                 | 0                                     | 0            | 0                              | 0            | 0            | 0               | 0                               | 0                                 |
| Lamp5 Fam19a1 Pax6    | 0                 | 0              | 0                              | 0                            | 0               | 0                              | 0                | 0                                    | 0              | 0             | 0                            | 0            | 0                            | 0                | 0              | 0           | 0                 | 0                                     | 0            | 0                              | 0            | 0            | 0               | 0                               | 0                                 |
| Lamp5 Fam19a1 Tmem182 | 0                 | 0              | 0                              | 0                            | 0               | 0                              | 2                | 1                                    | 0              | 0             | 0                            | 1            | 3                            | 0                | 0              | 0           | 0                 | 0                                     | 0            | 0                              | 0            | 0            | 0               | 0                               | 0                                 |
| Lamp5 Ntn1 Npy2r      | 0                 | 0              | 0                              | 0                            | 0               | 12                             | 3                | 0                                    | 17             | 24            | 12                           | 21           | 0                            | 1                | 0              | 0           | 0                 | 0                                     | 0            | 0                              | 0            | 0            | 1               | 0                               | 0                                 |
| Lamp5 Pch2 Dock5      | 0                 | 0              | 0                              | 0                            | 0               | 6                              | 10               | 0                                    | 29             | 32            | 33                           | 42           | 0                            | 6                | 3              | 0           | 13                | 5                                     | 0            | 0                              | 0            | 0            | 1               | 0                               | 0                                 |
| Lamp5 Lsp1            | 0                 | 0              | 2                              | 0                            | 0               | 10                             | 50               | 0                                    | 5              | 7             | 5                            | 10           | 2                            | 0                | 25             | 6           | 0                 | 18                                    | 11           | 0                              | 0            | 0            | 2               | 4                               | 0                                 |
| Lamp5 Lhx6            | 0                 | 0              | 0                              | 0                            | 0               | 0                              | 1                | 0                                    | 0              | 0             | 0                            | 0            | 12                           | 4                | 12             | 6           | 0                 | 0                                     | 0            | 0                              | 0            | 0            | 0               | 0                               | 0                                 |
| Sncg Slc17a8          | 0                 | 0              | 0                              | 0                            | 0               | 0                              | 0                | 0                                    | 0              | 0             | 0                            | 0            | 0                            | 0                | 0              | 0           | 0                 | 0                                     | 0            | 0                              | 0            | 0            | 0               | 0                               | 0                                 |
| Sncg Vip Npx2         | 0                 | 0              | 0                              | 1                            | 0               | 0                              | 0                | 2                                    | 2              | 0             | 0                            | 0            | 0                            | 0                | 0              | 0           | 0                 | 0                                     | 0            | 0                              | 0            | 0            | 8               | 1                               | 0                                 |
| Sncg Gpr50            | 0                 | 0              | 1                              | 3                            | 0               | 0                              | 0                | 4                                    | 2              | 0             | 0                            | 0            | 0                            | 0                | 0              | 0           | 0                 | 0                                     | 0            | 0                              | 0            | 0            | 0               | 0                               | 0                                 |
| Sncg Vip Itih5        | 1                 | 0              | 0                              | 1                            | 0               | 0                              | 0                | 3                                    | 9              | 0             | 0                            | 0            | 0                            | 0                | 0              | 0           | 0                 | 0                                     | 0            | 0                              | 0            | 3            | 5               | 2                               | 0                                 |
| Serpin1 Cim1          | 0                 | 0              | 0                              | 0                            | 0               | 0                              | 2                | 0                                    | 0              | 0             | 0                            | 0            | 0                            | 0                | 0              | 0           | 0                 | 0                                     | 0            | 0                              | 0            | 0            | 1               | 0                               | 0                                 |
| Serpin1 Aqp5 Vip      | 0                 | 0              | 0                              | 0                            | 0               | 0                              | 2                | 2                                    | 0              | 0             | 0                            | 0            | 0                            | 0                | 1              | 0           | 0                 | 0                                     | 0            | 0                              | 0            | 0            | 2               | 1                               | 0                                 |
| Vip Igfbp6 Car10      | 0                 | 1              | 0                              | 0                            | 0               | 0                              | 2                | 2                                    | 0              | 0             | 0                            | 0            | 1                            | 0                | 0              | 0           | 2                 | 0                                     | 0            | 0                              | 0            | 0            | 5               | 0                               | 0                                 |
| Vip Igfbp6 Pltp       | 0                 | 0              | 0                              | 0                            | 0               | 0                              | 6                | 0                                    | 0              | 0             | 0                            | 0            | 4                            | 0                | 0              | 0           | 2                 | 0                                     | 0            | 0                              | 0            | 0            | 1               | 0                               | 0                                 |
| Vip Lmo1 Fam159b      | 0                 | 0              | 2                              | 1                            | 0               | 0                              | 0                | 3                                    | 3              | 0             | 0                            | 0            | 0                            | 0                | 0              | 0           | 0                 | 0                                     | 0            | 0                              | 0            | 1            | 19              | 7                               | 1                                 |
| Vip Lmo1 Myl1         | 0                 | 1              | 0                              | 1                            | 0               | 0                              | 0                | 7                                    | 9              | 0             | 0                            | 0            | 0                            | 2                | 0              | 0           | 0                 | 0                                     | 0            | 0                              | 0            | 0            | 17              | 38                              | 1                                 |
| Vip Igfbp4 Mab211l    | 0                 | 0              | 0                              | 0                            | 0               | 0                              | 0                | 0                                    | 0              | 0             | 0                            | 0            | 1                            | 0                | 0              | 0           | 2                 | 0                                     | 0            | 0                              | 0            | 0            | 8               | 7                               | 0                                 |
| Vip Arhgap36 Hmcn1    | 0                 | 0              | 4                              | 0                            | 0               | 0                              | 0                | 2                                    | 0              | 0             | 0                            | 0            | 0                            | 0                | 0              | 0           | 0                 | 0                                     | 0            | 0                              | 0            | 0            | 57              | 24                              | 0                                 |
| Vip Gpc3 Slc18a3      | 0                 | 0              | 3                              | 0                            | 0               | 0                              | 0                | 5                                    | 2              | 0             | 0                            | 0            | 0                            | 0                | 0              | 0           | 0                 | 0                                     | 0            | 0                              | 0            | 0            | 31              | 11                              | 1                                 |
| Vip Ptprt Pkp2        | 36                | 23             | 0                              | 1                            | 0               | 0                              | 0                | 15                                   | 5              | 0             | 0                            | 0            | 0                            | 9                | 1              | 0           | 0                 | 0                                     | 0            | 0                              | 0            | 0            | 38              | 66                              | 3                                 |
| Vip Rspo4 Rxfp1 Chat  | 4                 | 14             | 0                              | 0                            | 0               | 0                              | 0                | 5                                    | 1              | 0             | 0                            | 0            | 0                            | 6                | 0              | 0           | 0                 | 0                                     | 0            | 0                              | 0            | 0            | 15              | 7                               | 0                                 |
| Vip Lect1 Oxtr        | 0                 | 0              | 0                              | 0                            | 0               | 0                              | 0                | 5                                    | 3              | 0             | 0                            | 0            | 0                            | 0                | 0              | 0           | 13                | 1                                     | 0            | 0                              | 0            | 0            | 14              | 14                              | 1                                 |
| Vip Rspo1 Itga4       | 0                 | 0              | 0                              | 0                            | 0               | 0                              | 0                | 1                                    | 1              | 0             | 0                            | 0            | 0                            | 0                | 0              | 0           | 3                 | 0                                     | 0            | 0                              | 0            | 0            | 6               | 3                               | 0                                 |
| Vip Chat Htr1f        | 1                 | 3              | 0                              | 0                            | 0               | 0                              | 0                | 9                                    | 3              | 0             | 0                            | 0            | 0                            | 5                | 0              | 0           | 11                | 1                                     | 0            | 0                              | 0            | 0            | 31              | 17                              | 6                                 |
| Vip Pygm C1ql1        | 1                 | 0              | 0                              | 0                            | 0               | 0                              | 0                | 6                                    | 2              | 0             | 0                            | 0            | 0                            | 0                | 0              | 0           | 5                 | 1                                     | 0            | 0                              | 0            | 0            | 29              | 36                              | 1                                 |
| Vip Crisp1d2 Htr2c    | 1                 | 0              | 0                              | 0                            | 0               | 0                              | 0                | 5                                    | 1              | 0             | 0                            | 0            | 0                            | 1                | 0              | 0           | 13                | 1                                     | 0            | 0                              | 0            | 1            | 28              | 14                              | 0                                 |
| Vip Crisp1d2 Kcne4    | 0                 | 0              | 0                              | 0                            | 0               | 0                              | 0                | 5                                    | 7              | 0             | 0                            | 0            | 0                            | 0                | 0              | 0           | 15                | 1                                     | 0            | 0                              | 0            | 3            | 21              | 39                              | 2                                 |
| Vip Col15a1 Pde1a     | 0                 | 1              | 0                              | 0                            | 0               | 0                              | 0                | 0                                    | 0              | 0             | 0                            | 0            | 0                            | 0                | 0              | 0           | 0                 | 0                                     | 0            | 0                              | 0            | 0            | 8               | 3                               | 0                                 |
| Sst Chodl             | 0                 | 0              | 0                              | 0                            | 0               | 0                              | 0                | 0                                    | 0              | 1             | 1                            | 1            | 0                            | 25               | 11             | 20          | 74                | 3                                     | 3            | 0                              | 0            | 0            | 3               | 2                               | 0                                 |
| Sst Mme Fam114a1      | 0                 | 0              | 0                              | 0                            | 0               | 0                              | 0                | 0                                    | 0              | 0             | 0                            | 0            | 0                            | 3                | 0              | 1           | 0                 | 2                                     | 0            | 1                              | 0            | 0            | 2               | 1                               | 0                                 |
| Sst Tac1 Htr1d        | 0                 | 0              | 0                              | 2                            | 1               | 0                              | 0                | 0                                    | 0              | 0             | 0                            | 0            | 0                            | 3                | 9              | 0           | 0                 | 4                                     | 1            | 0                              | 0            | 0            | 6               | 2                               | 0                                 |
| Sst Tac1 Tacr3        | 0                 | 0              | 0                              | 0                            | 0               | 0                              | 0                | 0                                    | 0              | 0             | 0                            | 0            | 0                            | 1                | 1              | 9           | 0                 | 1                                     | 0            | 4                              | 0            | 0            | 0               | 0                               | 0                                 |
| Sst Calb2 Necab1      | 0                 | 0              | 0                              | 0                            | 0               | 0                              | 0                | 0                                    | 0              | 0             | 0                            | 0            | 0                            | 0                | 0              | 2           | 1                 | 0                                     | 0            | 0                              | 0            | 0            | 13              | 8                               | 4                                 |
| Sst Calb2 Pdlim5      | 0                 | 0              | 0                              | 1                            | 1               | 0                              | 0                | 0                                    | 0              | 0             | 0                            | 0            | 0                            | 1                | 4              | 13          | 0                 | 0                                     | 0            | 0                              | 0            | 0            | 38              | 134                             | 0                                 |
| Sst Nr2f2 Necab1      | 0                 | 0              | 2                              | 1                            | 0               | 0                              | 0                | 0                                    | 0              | 0             | 0                            | 0            | 0                            | 1                | 4              | 2           | 0                 | 2                                     | 0            | 1                              | 0            | 0            | 5               | 11                              | 0                                 |
| Sst Myh8 Etv1         | 0                 | 0              | 6                              | 3                            | 1               | 1                              | 0                | 0                                    | 0              | 0             | 0                            | 0            | 0                            | 4                | 2              | 0           | 0                 | 1                                     | 0            | 0                              | 0            | 0            | 14              | 26                              | 0                                 |
| Sst Chma2 Gira3       | 0                 | 0              | 27                             | 2                            | 3               | 0                              | 0                | 0                                    | 4              | 0             | 18                           | 0            | 0                            | 1                | 0              | 0           | 0                 | 0                                     | 0            | 0                              | 0            | 0            | 33              | 3                               | 3                                 |
| Sst Myh8 Fibin        | 0                 | 1              | 6                              | 1                            | 0               | 0                              | 0                | 2                                    | 0              | 9             | 0                            | 0            | 1                            | 0                | 0              | 0           | 0                 | 0                                     | 0            | 0                              | 0            | 0            | 27              | 6                               | 0                                 |
| Sst Chma2 Ptgdr       | 0                 | 0              | 14                             | 0                            | 2               | 0                              | 0                | 2                                    | 0              | 4             | 0                            | 0            | 0                            | 0                | 0              | 0           | 9                 | 0                                     | 0            | 0                              | 0            | 0            | 15              | 1                               | 0                                 |
| Sst Tac2 Myh4         | 0                 | 0              | 3                              | 0                            | 0               | 0                              | 0                | 0                                    | 0              | 2             | 0                            | 0            | 0                            | 1                | 0              | 0           | 0                 | 0                                     | 0            | 0                              | 0            | 0            | 3               | 0                               | 0                                 |
| Sst Hpse Sema3c       | 0                 | 0              | 0                              | 0                            | 0               | 0                              | 0                | 1                                    | 0              | 5             | 0                            | 0            | 0                            | 0                | 0              | 0           | 6                 | 3                                     | 0            | 0                              | 73           | 11           | 0               | 0                               | 0                                 |
| Sst Hpse Cbln4        | 0                 | 0              | 0                              | 0                            | 0               | 0                              | 0                | 0                                    | 2              | 1             | 1                            | 0            | 0                            | 0                | 0              | 0           | 6                 | 15                                    | 0            | 0                              | 0            | 3            | 15              | 0                               | 0                                 |
| Sst Cnr2 Efemp1       | 0                 | 0              | 1                              | 0                            | 0               | 1                              | 0                | 0                                    | 0              | 1             | 1                            | 0            | 0                            | 1                | 1              | 0           | 2                 | 6                                     | 3            | 0                              | 0            | 2            | 0               | 0                               | 0                                 |
| Sst Cnr 4930553C11Rik | 0                 | 0              | 0                              | 1                            | 3               | 5                              | 0                | 0                                    | 0              | 0             | 0                            | 0            | 0                            | 2                | 0              | 0           | 4                 | 0                                     | 0            | 0                              | 0            | 0            | 1               | 4                               | 0                                 |
| Sst Esm1              | 0                 | 0              | 6                              | 4                            | 3               | 12                             | 0                | 0                                    | 0              | 3             | 0                            | 0            | 0                            | 0                | 0              | 0           | 0                 | 1                                     | 0            | 0                              | 0            | 0            | 2               | 0                               | 0                                 |
| Sst Tac2 Tacstd2      | 0                 | 0              | 4                              | 2                            | 15              | 18                             | 0                | 1                                    | 1              | 2             | 0                            | 0            | 0                            | 0                | 0              | 0           | 1                 | 0                                     | 0            | 0                              | 1            | 0            | 2               | 0                               | 0                                 |
| Sst Rxfp1 Eya1        | 0                 | 0              | 0                              | 0                            | 23              | 28                             | 0                | 0                                    | 1              | 1             | 1                            | 0            | 0                            | 1                | 0              | 0           | 1                 | 1                                     | 0            | 0                              | 0            | 1            | 0               | 1                               | 0                                 |
| Sst Rxfp1 Prdm8       | 0                 | 0              | 1                              | 2                            | 12              | 10                             | 0                | 0                                    | 1              | 5             | 5                            | 0            | 0                            | 1                | 0              | 0           | 1                 | 0                                     | 0            | 0                              | 0            | 0            | 1               | 0                               | 0                                 |
| Sst Nts               | 0                 | 0              | 1                              | 0                            | 0               | 0                              | 0                | 0                                    | 1              | 0             | 0                            | 0            | 0                            | 0                | 0              | 0           | 0                 | 0                                     | 0            | 0                              | 0            | 0            | 9               | 14                              | 0                                 |
| Pvalb Gabrg1          | 0                 | 0              | 8                              | 2                            | 0               | 0                              | 0                | 0                                    | 0              | 1             | 0                            | 0            | 0                            | 0                | 0              | 0           | 0                 | 0                                     | 0            | 0                              | 0            | 4            | 8               | 5                               | 2                                 |
| Pvalb Th Sst          | 0                 | 0              | 3                              | 2                            | 2               | 0                              | 0                | 0                                    | 0              | 0             | 0                            | 0            | 0                            | 0                | 0              | 0           | 3                 | 1                                     | 0            | 0                              | 2            | 0            | 11              | 0                               | 0                                 |
| Pvalb Calb1 Sst       | 0                 | 0              | 1                              | 0                            | 0               | 0                              | 0                | 0                                    | 1              | 0             | 0                            | 0            | 0                            | 1                | 0              | 3           | 0                 | 0                                     | 0            | 0                              | 0            | 7            | 2               | 0                               | 0                                 |
| Pvalb Akrlc18 Ntf3    | 0                 | 0              | 2                              | 0                            | 0               | 1                              | 0                | 0                                    | 1              | 1             | 0                            | 0            | 0                            | 0                | 0              | 0           | 15                | 11                                    | 1            | 1                              | 2            | 3            | 10              | 2                               | 0                                 |
| Pvalb Sema3e Kank4    | 0                 | 0              | 0                              | 0                            | 0               | 0                              | 0                | 0                                    | 0              | 2             | 0                            | 0            | 0                            | 0                | 0              | 0           | 3                 | 2                                     | 0            | 0                              | 0            | 20           | 64              | 0                               | 0                                 |
| Pvalb Gpr149 Islr     | 0                 | 0              | 1                              | 1                            | 0               | 0                              | 0                | 6                                    | 1              | 0             | 0                            | 0            | 0                            | 0                | 0              | 0           | 55                | 11                                    | 0            | 0                              | 0            | 12           | 0               | 1                               | 0                                 |
| Pvalb ReIn Itm2a      | 0                 | 0              | 0                              | 0                            | 0               | 4                              | 1                | 0                                    | 2              | 0             | 0                            | 0            | 0                            | 1                | 0              | 0           | 28                | 111                                   | 0            | 1                              | 6            | 2            | 0               | 1                               | 0                                 |
| Pvalb ReIn Tac1       | 0                 | 0              | 1                              | 0                            | 0               | 0                              | 4                | 0                                    | 1              | 1             | 0                            | 0            | 0                            | 1                | 1              | 2           | 0                 | 0                                     | 0            | 0                              | 0            | 156          | 7               | 1                               | 0                                 |
| Pvalb Tpbg            | 0                 | 1              | 0                              | 0                            | 0               | 43                             | 0                | 0                                    | 1              | 1             | 0                            | 0            | 0                            | 1                | 2              | 0           | 15                | 8                                     | 15           | 2                              | 0            | 0            | 4               | 17                              | 0                                 |
| Pvalb Vipr2           | 0                 | 0              | 0                              | 0                            | 0               | 0                              | 0                | 0                                    | 0              | 0             | 0                            | 0            | 0                            | 0                | 0              | 0           | 6                 | 1                                     | 0            | 0                              | 0            | 0            | 0               | 0                               | 0                                 |

Table S2. Summary of Sst met-type properties and relationships to the literature, related to Figure 6.

| MET-type:                                       | Sst-MET-1                                                                                                                                                                              | Sst-MET-2                                                                                                                                                                                              | Sst-MET-3                                                                                                                                               | Sst-MET-4                                                                                                                                                            | Sst-MET-5                                                                                                                                                                                               | Sst-MET-6                                                                                                                                                                              | Sst-MET-7                                                                              |
|-------------------------------------------------|----------------------------------------------------------------------------------------------------------------------------------------------------------------------------------------|--------------------------------------------------------------------------------------------------------------------------------------------------------------------------------------------------------|---------------------------------------------------------------------------------------------------------------------------------------------------------|----------------------------------------------------------------------------------------------------------------------------------------------------------------------|---------------------------------------------------------------------------------------------------------------------------------------------------------------------------------------------------------|----------------------------------------------------------------------------------------------------------------------------------------------------------------------------------------|----------------------------------------------------------------------------------------|
| Example Morphologies                            |                                                                                                                                                                                        |                                                                                                                                                                                                        |                                                                                                                                                         |                                                                                                                                                                      |                                                                                                                                                                                                         |                                                                                                                                                                                        |                                                                                        |
| Morphological Description                       | wide branching, horizontal bitufted dendrites with overlapping and axon that densely innervates the somato-dendritic area ventral to the soma; examples of translaminar and local axon | Mix of superficial Sst neurons that either densely innervate L2/3 and most largely avoid L1, or that densely innervate L1; small number deep neurons; most neurons also extend axon into deeper layers | dendrites that mostly avoid L1; Axon that dominantly innervates L1 and to a lesser extent, L2/3; occasionally sparse axon collaterals that extend to L6 | Multipolar dendrites, restricted to deep layers; L1 dominant axon, with multiple collaterals branching widely or in a bundle and heading up to L1                    | L5 dominant axon with sparse collaterals heading up to L1. Some cells also have enrichment of L2/3 axon. Dendrites are located in deep L5 and are offset with the bulk of local axon in superficial L5. | Ascending axon that either projects up to L1 and branches or terminates without a tuft at L1-L2/3 border. Dendrites are located in deep L5 and are offset with the bulk of local axon. | Dense L4 innervation, with or without axon that extends all the way up to L1           |
| Layer                                           | All layers                                                                                                                                                                             | L2/3-5                                                                                                                                                                                                 | L2/3, L4                                                                                                                                                | Superficial L5                                                                                                                                                       | Deep L5                                                                                                                                                                                                 | L5                                                                                                                                                                                     | Superficial L5                                                                         |
| Example Ephys Traces                            |                                                                                                                                                                                        |                                                                                                                                                                                                        |                                                                                                                                                         |                                                                                                                                                                      |                                                                                                                                                                                                         |                                                                                                                                                                                        |                                                                                        |
| Ephys Description                               | irregular spiking/adapting with long $\tau_m$                                                                                                                                          | Mostly fast spiking (Sst Tac1 Htr1d and Sst Tac1 Tacr3) and mid-width spiking Sst neurons (Sst Calb2 Necab1)                                                                                           | mid-width spiking                                                                                                                                       | Mostly mid-width spiking; Some cells (Sst Nr2f2 Necab1) had burst like or very strongly adapting firing                                                              | Mostly mid-width spiking; Some cells (Sst Nr2f2 Necab1) had burst like or very strongly adapting firing                                                                                                 | mid-width spiking with higher input resistance than Sst-MET-5                                                                                                                          | mid-width spiking                                                                      |
| Up-regulated Gene Transcripts                   | Sst, Chodl, Calb2 (CR)                                                                                                                                                                 | Sst, Tac1, Calb2, Necab1, Pvalb                                                                                                                                                                        | Sst, Calb2 (CR), Pdlim5, Hpse                                                                                                                           | Sst, Calb2 (CR), Pdlim5, Hpse                                                                                                                                        | Sst, Necab1, Nr2f2                                                                                                                                                                                      | Sst, Nr2f2, Chrna2                                                                                                                                                                     | Sst, Sema3c, Hpse                                                                      |
| Down-regulated Gene Transcripts                 | Pvalb, Lamp5, Ndnf, Npy, Chat, Tac1, Pdlim5, Necab1, Nr2f2, Chrna2, Sema3c, Hpse, Crh, Rxfp1, Esm1, Nts                                                                                | Lamp5, Ndnf, Vip, Chodl, Pdlim5, Nr2f2, Chrna2, Sema3c, Hpse, Ndnf, Crh, Rxfp1, Esm1, Nts                                                                                                              | Lamp5, Ndnf, Chodl, Tac1, Necab1, Nr2f2, Chrna2, Sema3c, Crh, Rxfp1, Esm1, Nts                                                                          | Lamp5, Ndnf, Vip, Chodl, Tac1, Necab1, Nr2f2, Chrna2, Sema3c, Crh, Rxfp1, Esm1, Nts                                                                                  | Ndnf, Chodl, Tac1, Calb2 (CR), Pdlim5, Chrna2, Sema3c, Hpse, Crh, Rxfp1, Esm1, Nts                                                                                                                      | Ndnf, Chodl, Tac1, Calb2 (CR), Pdlim5, Necab1, Sema3c, Hpse, Crh, Rxfp1, Esm1, Nts                                                                                                     | Ndnf, Chodl, Tac1, Calb2 (CR), Pdlim5, Necab1, Nr2f2, Chrna2, Crh, Rxfp1, Esm1, Nts    |
| Previously Described Cell Types                 | long-range projecting interneuron (He et al., 2016); me-type 22-23 (Gouwens et al., 2019)                                                                                              | Mix of L2/3 Non-Martinotti (mostly avoids L1) and L2/3 Martinotti (densely innervates L1) (Muñoz et al., 2017); me-type 15 and 26 (Gouwens et al., 2019)                                               | L2/3 and L4 Martinotti (Muñoz et al., 2017; Wang et al., 2004); me-type 15, 24 and 26 (Gouwens et al., 2019)                                            | Fanning and T-shaped Martinotti (Muñoz et al., 2017; Nigro et al., 2019); L5 Martinotti (Wang et al., 2004; Markram et al., 2015); me-type 25 (Gouwens et al., 2019) | Fanning Martinotti (Muñoz et al., 2017; Nigro et al., 2019); me-type 25 (Gouwens et al., 2019)                                                                                                          | T-shaped and non-Martinotti (Muñoz et al., 2017; Nigro et al., 2019); MC <sup>2</sup> (Hilscher et al., 2017); me-type 24 (Gouwens et al., 2019)                                       | T-shaped and L4 non-Martinotti (Muñoz et al., 2017); me-type 24 (Gouwens et al., 2019) |
| ViSp-ALM Transcriptomic type(s) within MET-type | Sst Chodl                                                                                                                                                                              | Sst Tac1 Htr1d<br>Sst Tac1 Tacr3<br>Sst Calb2 Necab1                                                                                                                                                   | Sst Calb2 Pdlim5<br>Sst Calb2 Necab1<br>Sst Hpse Cbln4                                                                                                  | Sst Calb2 Pdlim5<br>Sst Calb2 Necab1<br>Sst Nr2f2 Necab1                                                                                                             | Sst Nr2f2 Necab1<br>Sst Myh8 Etv1                                                                                                                                                                       | Sst Chrna2 Glra3<br>Sst Myh8 Etv1<br>Sst Chrna2 Ptgdr                                                                                                                                  | Sst Hpse Sema3c                                                                        |

| MET-type:                                       | Sst-MET-8                                                                                                                                              | Sst-MET-9                                                                                                    | Sst-MET-10                                                                                                                                    | Sst-MET-11                                                                                           | Sst-MET-12                                                                                                                  | Sst-MET-13                                                                                                                                               |
|-------------------------------------------------|--------------------------------------------------------------------------------------------------------------------------------------------------------|--------------------------------------------------------------------------------------------------------------|-----------------------------------------------------------------------------------------------------------------------------------------------|------------------------------------------------------------------------------------------------------|-----------------------------------------------------------------------------------------------------------------------------|----------------------------------------------------------------------------------------------------------------------------------------------------------|
| Example Morphologies                            |                                                                                                                                                        |                                                                                                              |                                                                                                                                               |                                                                                                      |                                                                                                                             |                                                                                                                                                          |
| Morphological Description                       | Dense L2/3 and dominant L4 axon innervation, with or without axon that extends all the way up to L1                                                    | L5-L6 dendrites, dense local L5 axon, multiple axon collaterals projecting up to L1, sparse to dense L1 axon | Dendrites and axon distributed across L5 and L6, with clear avoidance of L4 apart from a single collateral crossing L4. Sometimes reaches L1. | Small mixed cluster: Either dense L2/3 axon that extends up to L1 and turns, or local L5 and L6 axon | Large, mixed cluster: Axon sparsely elaborates either in L2/3, L4 or deep layers, infrequently extends all the way up to L1 | L5 or L6 dominant axon, clear avoidance of L4 apart from sparse axon extending up to L1.                                                                 |
| Layer                                           | L4 and superficial L5                                                                                                                                  | L5, minimal L6                                                                                               | Deep L5 and L6                                                                                                                                | superficial L5                                                                                       | L4-6                                                                                                                        | Deep L5 and L6                                                                                                                                           |
| Example Ephys Traces                            |                                                                                                                                                        |                                                                                                              |                                                                                                                                               |                                                                                                      |                                                                                                                             |                                                                                                                                                          |
| Ephys Description                               | lower AP thresholds, less hyperpolarization-evoked sag, and more transient or irregular firing                                                         | mid-width spiking                                                                                            | mid-width spiking; much less sag than Sst-MET-9                                                                                               | mid-width spiking; L5 cells with low upstroke/downstroke ratio and low input resistances             | mid-width spiking                                                                                                           | mid-width spiking                                                                                                                                        |
| Up-regulated Gene Transcripts                   | Sst, Hpse                                                                                                                                              | Sst, Nr2f2, Sema3c, Ndnf, Crh, Rxfp1, Esm1, Nts                                                              | Sst, Pdlim5, Necab1, Sema3c, Crh, Rxfp1                                                                                                       | Sst, Necab1, Hpse                                                                                    | Sst, Pdlim5, Hpse, Crh, Rxfp1, Esm1                                                                                         | Sst, Pdlim5, Crh, Esm1, Nts                                                                                                                              |
| Down-regulated Gene Transcripts                 | Ndnf, Chodl, Tac1, Calb2 (CR), Pdlim5, Necab1, Nr2f2, Chrna2, Sema3c, Crh, Rxfp1, Esm1, Nts                                                            | Chodl, Tac1, Calb2 (CR), Pdlim5, Necab1, Chrna2, Hpse, Esm1, Nts                                             | Chodl, Tac1, Calb2 (CR), Nr2f2, Chrna2, Hpse, Ndnf, Esm1, Nts                                                                                 | Chodl, Tac1, Calb2, Pdlim5, Nr2f2, Crh, Rxfp1, Esm1, Nts                                             | Chodl, Tac1, Calb2(CR), Necab1, Chrna2, Sema3c, Ndnf, Nts                                                                   | Chodl, Tac1, Calb2(CR), Necab1, Chrna2, Sema3c, Pvalb, Hpse, Ndnf, Rxfp1                                                                                 |
| Previously Described Cell Types                 | L4/L5 Martinotti and Non-Martinotti (Naka et al., 2019; Scala et al., 2019; Muñoz et al., 2017; Ma et al., 2006); me-type 24-25 (Gouwens et al., 2019) | Wide Fanning Martinotti (Muñoz et al., 2017); Deep Non-Martinotti; me-type 24-25 (Gouwens et al., 2019)      | L5 and L6 Non-Martinotti and Martinotti; me-type 22 and 25 (Gouwens et al., 2019)                                                             | L5 Martinotti with turning L1 axon; L5 deep non-Martinotti; me-type 26 (Gouwens et al., 2019)        | Mostly Non-Martinotti (Nigro et al., 2018); me-type 6, 22 (Gouwens et al., 2019)                                            | Deep Non-Martinotti and Martinotti (Naka et al., 2019; Scala et al., 2019; Muñoz et al., 2017; Ma et al., 2006); me-type 6, 24-25 (Gouwens et al., 2019) |
| ViSp-ALM Transcriptomic type(s) within MET-type | Sst Hpse Cbln4                                                                                                                                         | Sst Tac2 Tacstd2<br>Sst Tac2 Myh4                                                                            | Sst Rxfp1 Prdm8<br>Pvalb Th Sst                                                                                                               | Sst Mme Fam114a1<br>Sst Hpse Cbln4                                                                   | Sst Hpse Cbln4<br>Sst Mme Fam114a1<br>Sst Esm1<br>Sst Crhr2 Efemp1<br><br>Sst Crh 4930553C11Rik<br>Sst Rxfp1 Eya1           | Sst Esm1<br>Sst Nts                                                                                                                                      |

Table S3. Summary of Pvalb met-type properties and relationships to the literature, related to Figure 6.

| MET-type:                                       | Pvalb-MET-1                                                                                                                                                                                                                | Pvalb-MET-2                                                                                                                                                       | Pvalb-MET-3                                                                                                                                                              | Pvalb-MET-4                                                                                                                                      | Pvalb-MET-5                                                                                                               |
|-------------------------------------------------|----------------------------------------------------------------------------------------------------------------------------------------------------------------------------------------------------------------------------|-------------------------------------------------------------------------------------------------------------------------------------------------------------------|--------------------------------------------------------------------------------------------------------------------------------------------------------------------------|--------------------------------------------------------------------------------------------------------------------------------------------------|---------------------------------------------------------------------------------------------------------------------------|
| Example Morphologies                            |                                                                                                                                                                                                                            |                                                                                                                                                                   |                                                                                                                                                                          |                                                                                                                                                  |                                                                                                                           |
| Morphological Description                       | dendrites and sparse axon in deep L5 and L6 with horizontal orientation; dendrites and axon overlap                                                                                                                        | translaminal dendrites and a descending, frequently triangular-shaped axon; axons mostly restricted to L5 and/or L6                                               | mix of translaminal axon and local axon with the major axon in superficial L5                                                                                            | superficial translaminal cells with dense L2/3 axon and sparse descending branches; small number of Lamp5 ngc-like cells with similar morphology | L1 Dendrites, descending axons offset from dendrites with cartridge-like boutons                                          |
| Layer                                           | L5/6 border only                                                                                                                                                                                                           | L6                                                                                                                                                                | L4, superficial L5                                                                                                                                                       | L2/3 and L4                                                                                                                                      | L2/3                                                                                                                      |
| Example Ephys Traces                            |                                                                                                                                                                                                                            |                                                                                                                                                                   |                                                                                                                                                                          |                                                                                                                                                  |                                                                                                                           |
| Ephys Description                               | fast spiking with more hyperpolarization-induced sag than other Pvalb MET-types                                                                                                                                            | fast spiking                                                                                                                                                      | fast spiking                                                                                                                                                             | fast spiking                                                                                                                                     | fast spiking                                                                                                              |
| Up-regulated Gene Transcripts                   | Pvalb, Gabrg1, Bche, Th                                                                                                                                                                                                    | Pvalb, Sst, Sema3e, Htr2c                                                                                                                                         | Pvalb, Htr2c, Reln                                                                                                                                                       | Pvalb, Reln, Calb1, Pdlim3                                                                                                                       | Pvalb, Gabrg1, Pdlim3, Vipr2                                                                                              |
| Down-regulated Gene Transcripts                 | Sst, Sema3e, Htr2c, Reln, Calb1, Pdlim3, Vipr2, Vip, Chat, Sncg                                                                                                                                                            | Gabrg1, Bche, Th, Reln, Calb1, Pdlim3, Vipr2, Vip, Chat, Sncg                                                                                                     | Gabrg1, Bche, Th, Sst, Calb1, Vipr2, Vip, Chat, Sncg                                                                                                                     | Gabrg1, Bche, Th, Sst, Sema3e, Htr2c, Vipr2, Vip, Chat, Sncg                                                                                     | Bche, Th, Sst, Sema3e, Htr2c, Reln, Calb1, Vip, Chat, Sncg                                                                |
| Previously Described Cell Types                 | fast spiking basket cell (BC), nest basket cell (Markram et al., 2015); fast spiking BC, DBC, (Jiang et al., 2015; Scala et al., 2019); locally-projecting L6 BCs (Bortone et al., 2014); me-type 7 (Gouwens et al., 2019) | Basket Cell (Markram et al., 2015); Descending Cell (DC) (Jiang et al., 2015); locally-projecting L6 BCs (Bortone et al., 2014); me-type 9 (Gouwens et al., 2019) | Interlaminar (Frandonig et al., 2019); basket cell (Markram et al., 2015); BC, Horizontally Extending Cell (HEC) (Jiang et al., 2015); me-type 11 (Gouwens et al., 2019) | Interlaminar (Frandonig et al., 2019); Translaminal (Bortone et al., 2014); me-type 16 (Gouwens et al., 2019)                                    | Chandelier (Woodruff and Yuste, 2008; Taniguchi et al., 2013; Inan and Anderson, 2014); me-type 21 (Gouwens et al., 2019) |
| VISp-ALM Transcriptomic type(s) within MET-type | Pvalb Gabrg1                                                                                                                                                                                                               | Pvalb Sema3e Kank4<br>Pvalb Akrc18 Ntf3<br>Pvalb Th Sst<br>Pvalb Calb1 Sst                                                                                        | Pvalb Reln Tac1<br>Pvalb Gpr149 Islr                                                                                                                                     | Pvalb Tpbp<br>Pvalb Reln Itm2a                                                                                                                   | Pvalb Vipr2                                                                                                               |

Table S4. Summary of Lamp5, Sncg, and Vip met-type properties and relationships to the literature, related to Figure 7.

| MET-type:                                       | Lamp5-MET-1                                                                                                                                                                     | Lamp5-MET-2                                                                          | Sncg-MET-1                                                                                                                                       | Sncg-MET-2                                                                        | Sncg-MET-3                                                                         |
|-------------------------------------------------|---------------------------------------------------------------------------------------------------------------------------------------------------------------------------------|--------------------------------------------------------------------------------------|--------------------------------------------------------------------------------------------------------------------------------------------------|-----------------------------------------------------------------------------------|------------------------------------------------------------------------------------|
| Example Morphologies                            | 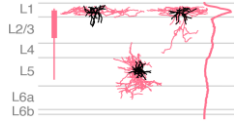                                                                                               |     |                                                                 |  |  |
| Morphological Description                       | small, complex dendrites, dense axon that is either isolated to L1 or crosses multiple layers; dendrite and axon overlap                                                        | small, complex dendrites, dense axon that crosses layers and overlaps with dendrites | bitufted and multipolar dendrites; wide translaminal axon with enriched local (somato-dendritic) axon innervation pattern; axon mostly avoids L1 | bitufted dendrites, sparse, descending axon                                       | Large, multi-polar dendrites                                                       |
| Layer                                           | All layers                                                                                                                                                                      | L6 only                                                                              | L2/3-6                                                                                                                                           | L1 and L2/3                                                                       | L5                                                                                 |
| Example Ephys Traces                            |                                                                                                |     |                                                                 |  |  |
| Ephys Description                               | high upstroke/downstroke ratios; mix of late-spiking phenotype, as measured by the latency to the first action potential at rheobase                                            | high upstroke/downstroke ratios; late spiking                                        | regular, adapting firing                                                                                                                         | irregular spiking; very high input resistances                                    | irregular spiking                                                                  |
| Up-regulated Gene Transcripts                   | Lamp5, Npy, Ndnf, Necab1, Sema3e, Nr2f2, Pde1a                                                                                                                                  | Lamp5, Npy, Lhx6, Plch2, Nkx2.1                                                      | Vip, Sncg, Cck, Reln, Nptx2, Ptprr, Pde1a                                                                                                        | Vip, Sncg, Cck, Reln, Nptx2, Car10, Ptprr, Pde1a                                  | Vip, Sst, Pvalb, Nptx2, Reln, Nptx2, Car10                                         |
| Down-regulated Gene Transcripts                 | Sst, Pvalb, Vip, Sncg, Pax6, Krt73, Lhx6                                                                                                                                        | Sst, Pvalb, Vip, Sncg, Ndnf, Necab 1, Sema3e, Nr2f2, Pax6, Pde1a                     | Sst, Pvalb, Ndnf, Rspo4, Chat, Car10, Krt73, Slc17a8                                                                                             | Sst, Pvalb, Ndnf, Rspo4, Chat, Krt73, Slc17a8                                     | Vip, Sst, Pvalb, Nptx2, Reln, Nptx2, Car10                                         |
| Previously Described Cell Types                 | L1 neurogliaform cells (NGCs) (Jiang et al., 2015; Jiang et al., 2013); Canopy-like NGCs (Schuman et al., 2019); L2/3-6 late spiking NGCs; me-type 17-20 (Gouwens et al., 2019) | deep late spiking NGC, me-type 19 (Gouwens et al., 2019)                             | Vip+/Cck+ basket cells (Tasic 2018)                                                                                                              | Vip+/Cck+ basket cells (Tasic 2018)                                               | Vip+/Cck+ basket cells (Tasic 2018)                                                |
| ViSp-ALM Transcriptomic type(s) within MET-type | Lamp5 Lsp1<br>Lamp5 Ntn1 Npy2r<br>Lamp5 Plch2 Dock5                                                                                                                             | Lamp5 Lhx6                                                                           | Sncg Gpr50<br>Sncg Vip Itih5<br>Sncg Vip Nptx2<br>Vip Col15a1 Pde1a                                                                              | Sncg Gpr50<br>Sncg Vip Nptx2                                                      | Sncg Slc17a8                                                                       |

| MET-type:                                       | Vip-MET-1                                                                                                     | Vip-MET-2                                                                                                                 | Vip-MET-3                                                                                                             | Vip-MET-4                                                                                                                                                   | Vip-MET-5                                                                                                     |
|-------------------------------------------------|---------------------------------------------------------------------------------------------------------------|---------------------------------------------------------------------------------------------------------------------------|-----------------------------------------------------------------------------------------------------------------------|-------------------------------------------------------------------------------------------------------------------------------------------------------------|---------------------------------------------------------------------------------------------------------------|
| Example Morphologies                            | 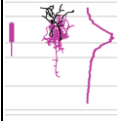                             |                                          |                                      |                                                                            |                              |
| Morphological Description                       | Bitufted dendrites, descending axon, wider branching near soma with majority of axon in L2/3                  | Bitufted and bipolar dendrites and narrow axon that descends to L6; wider axonal branching in deep layers; axon avoids L4 | Small cluster: Short, wide branching bitufted dendrites, descending axon with elaborate branching at layer boundaries | Bitufted and bipolar dendrites and narrow axon that descends to L6. Wider axonal branching in deep layers, with enriched axonal innervation in L2/3 and L4. | Bitufted and bipolar dendrites with axon that ascends to L1 with wider axon and descends to L6                |
| Layer                                           | L2/3 and 4                                                                                                    | L2/3 and L4                                                                                                               | L2/3 and L5                                                                                                           | L2/3-5                                                                                                                                                      | L2/3                                                                                                          |
| Example Ephys Traces                            |                              |                                          |                                      |                                                                            |                              |
| Ephys Description                               | regular, sustained firing                                                                                     | irregular spiking                                                                                                         | irregular spiking                                                                                                     | irregular firing and had more hyperpolarization-evoked sag                                                                                                  | irregular spiking with deeper hyperpolarization-induced sag                                                   |
| Up-regulated Gene Transcripts                   | Vip, Cck, Npy, Chat                                                                                           | Vip, Cck, Chat, Ptprt, Rspo1                                                                                              | Vip, Cck, Sfrp2, Lmo1                                                                                                 | Vip, Chat, Sfrp2, Lmo1, Myl1, Crispld2                                                                                                                      | Vip, Cck, Crispld2                                                                                            |
| Down-regulated Gene Transcripts                 | Sst, Pvalb, Lamp5, Ndnf, Ptprt, Rspo1, Sfrp2, Lmo1, Myl1, Crispld2                                            | Sst, Pvalb, Lamp5, Ndnf, Npy, Sfrp2, Lmo1, Myl1, Crispld2                                                                 | Sst, Pvalb, Lamp5, Ndnf, Npy, Chat, Ptprt, Rspo1, Myl1, Crispld2                                                      | Sst, Pvalb, Lamp5, Ndnf, Cck, Npy, Ptprt, Rspo1                                                                                                             | Sst, Pvalb, Lamp5, Npy, Chat, Ptprt, Rspo1, Sfrp2, Lmo1, Myl1                                                 |
| Previously Described Cell Types                 | Bipolar and Bitufted cells (Prönneke et al., 2015; Peters and Kara, 1985); me-type 1-3 (Gouwens et al., 2019) | Bipolar and Bitufted cells (Prönneke et al., 2015; Peters and Kara, 1985); me-type 3 (Gouwens et al., 2019)               | Bipolar and Bitufted cells (Prönneke et al., 2015; Peters and Kara, 1985); me-type 1-5 (Gouwens et al., 2019)         | Bipolar and Bitufted cells (Prönneke et al., 2015; Peters and Kara, 1985); me-type 1-5 (Gouwens et al., 2019)                                               | Bipolar and Bitufted cells (Prönneke et al., 2015; Peters and Kara, 1985); me-type 1-2 (Gouwens et al., 2019) |
| ViSp-ALM Transcriptomic type(s) within MET-type | Vip Rspo1 Itga4<br>Vip Chat Htr1f<br>Vip Pygm C1q1<br>Vip Igfbp4<br>Mab2111                                   | Vip Ptprt Pkp2<br>Vip Rspo4 Rxfp1 Chat<br>Vip Gpc3 Slc18a3                                                                | Vip Lmo1 Fam159b                                                                                                      | Vip Lmo1 Myl1<br>Vip Crispld2 Kcne4<br>Vip Lect1 Oxtr                                                                                                       | Vip Crispld2 Htr2c<br>Vip Lect1 Oxtr<br>Vip Crispld2 Kcne4<br>Vip Rspo1 Itga4                                 |
