# Supplementary material
Source: PubMed Central journal article supplement (PMC7781065)

**A**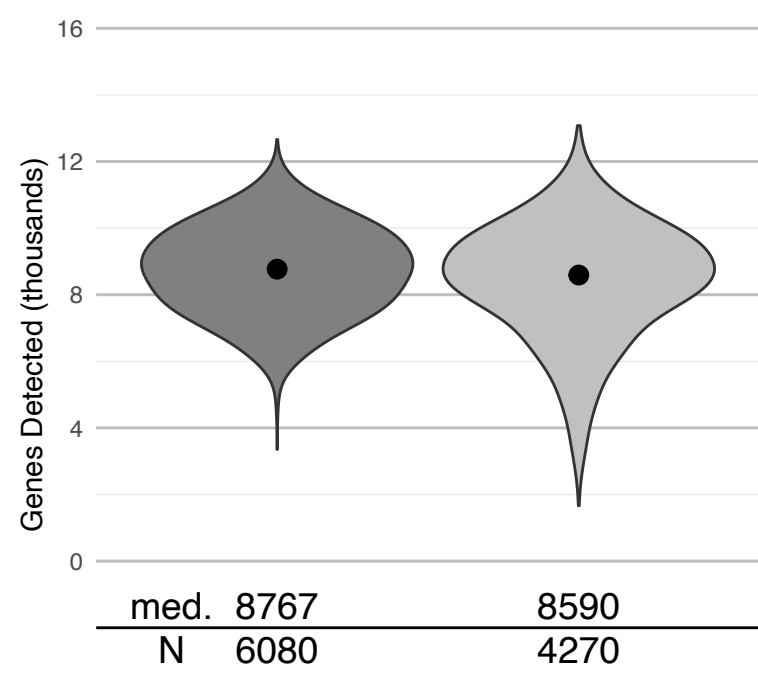**B**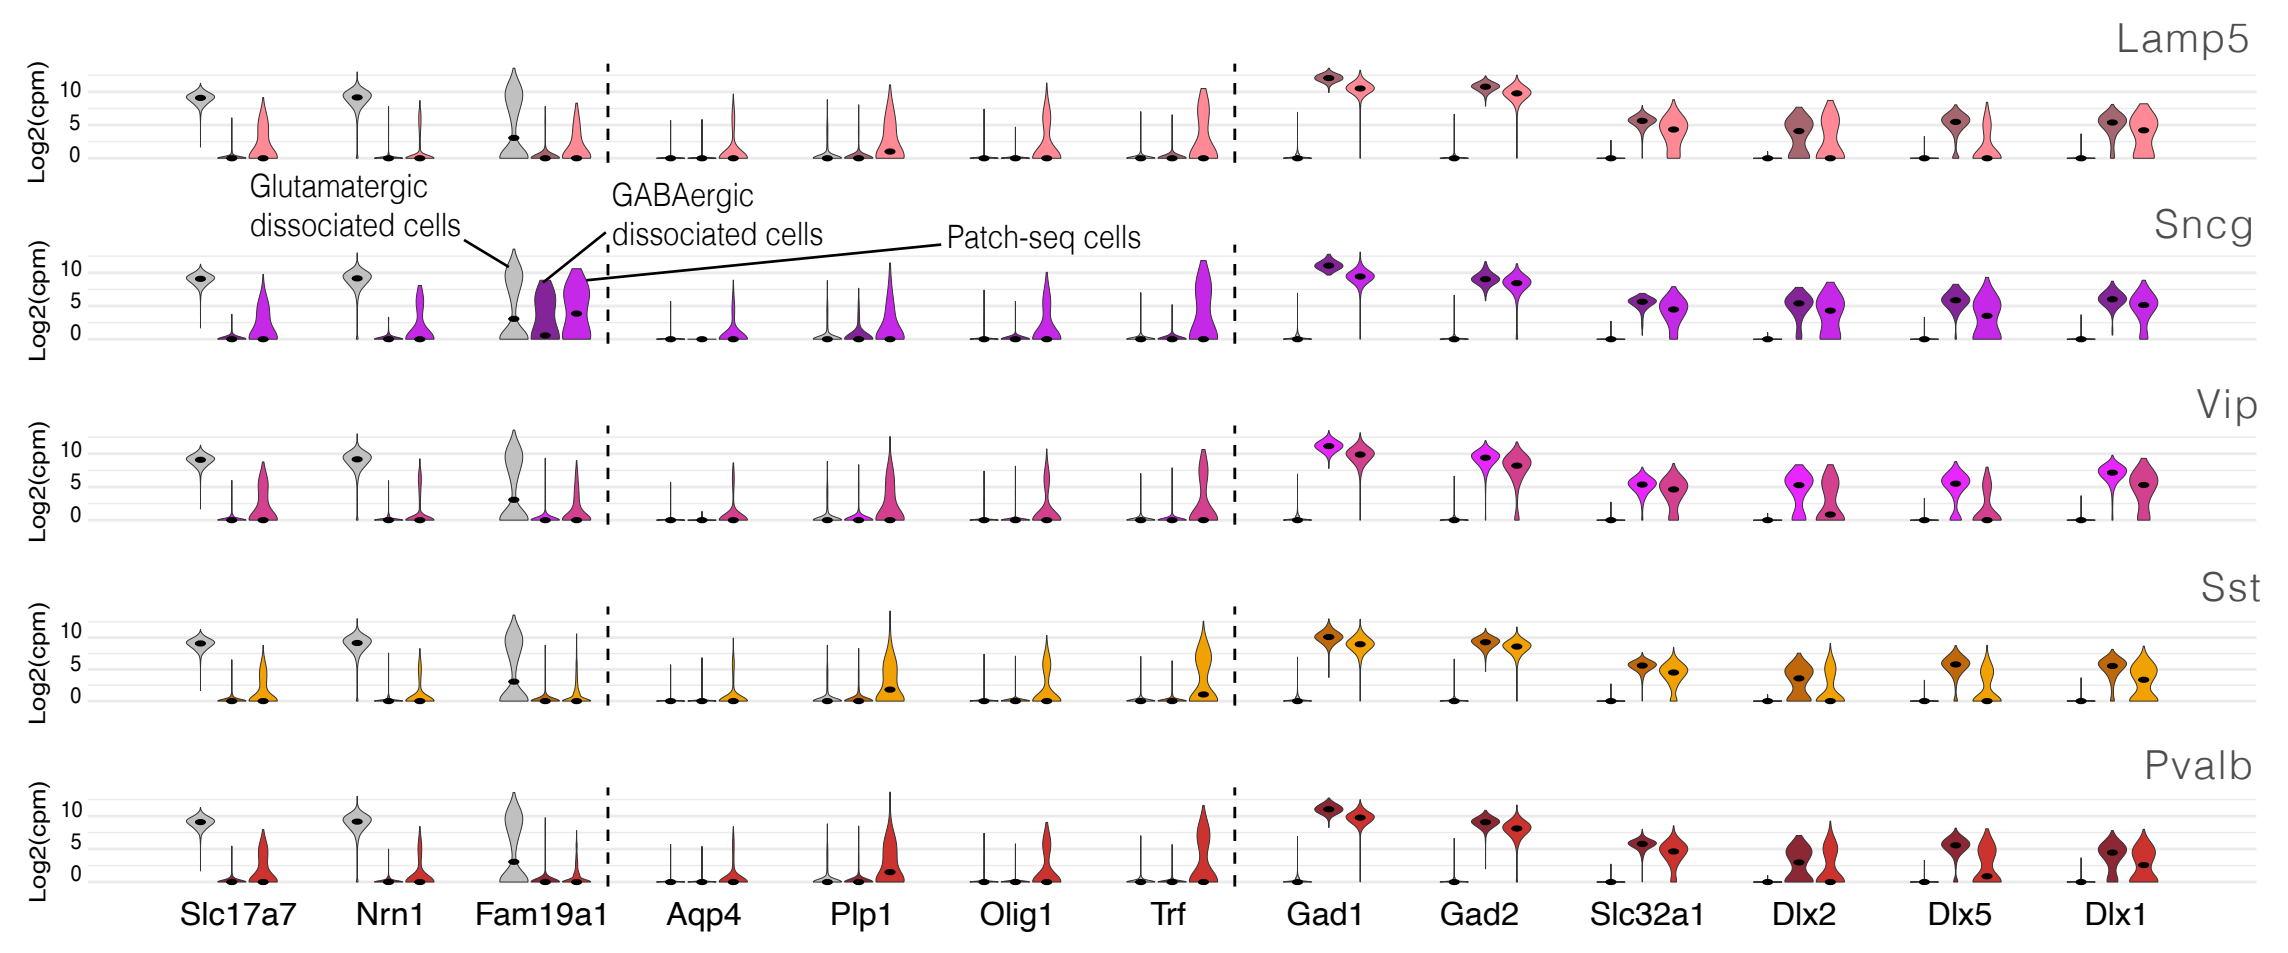**C**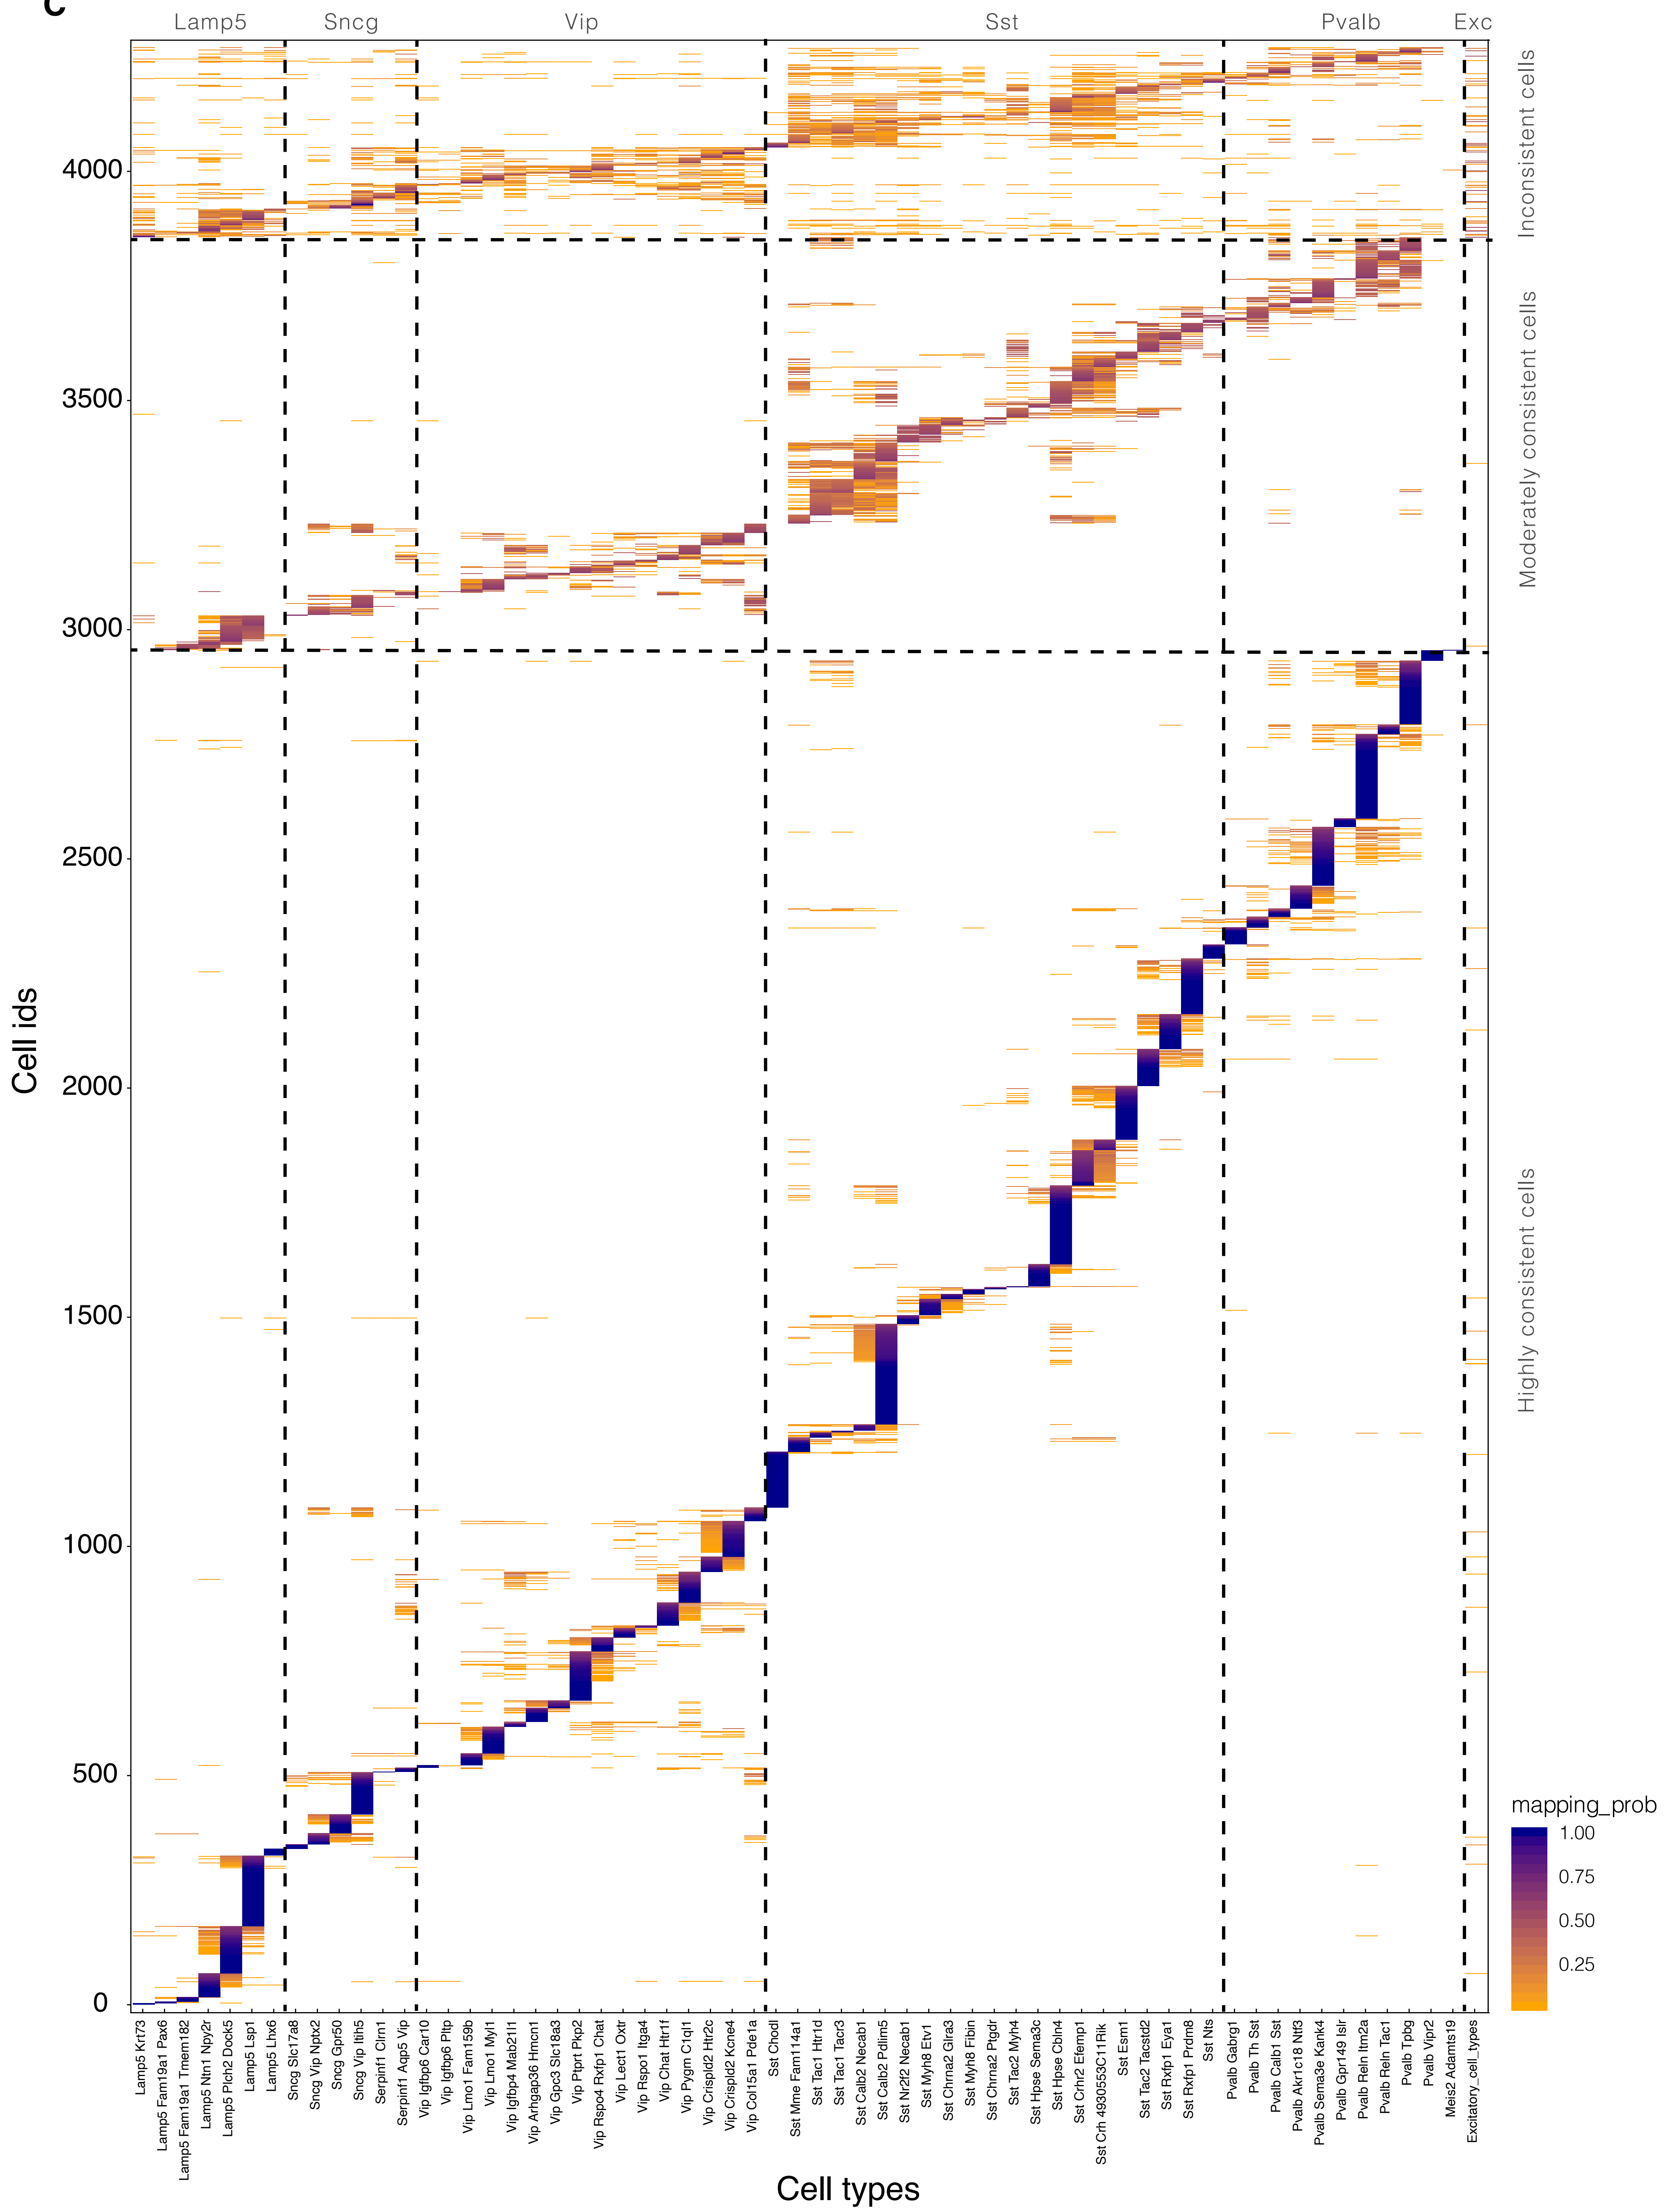

Supplement: NIHMS1640606-supplement-2.pdf [file NIHMS1640606-supplement-2.pdf]

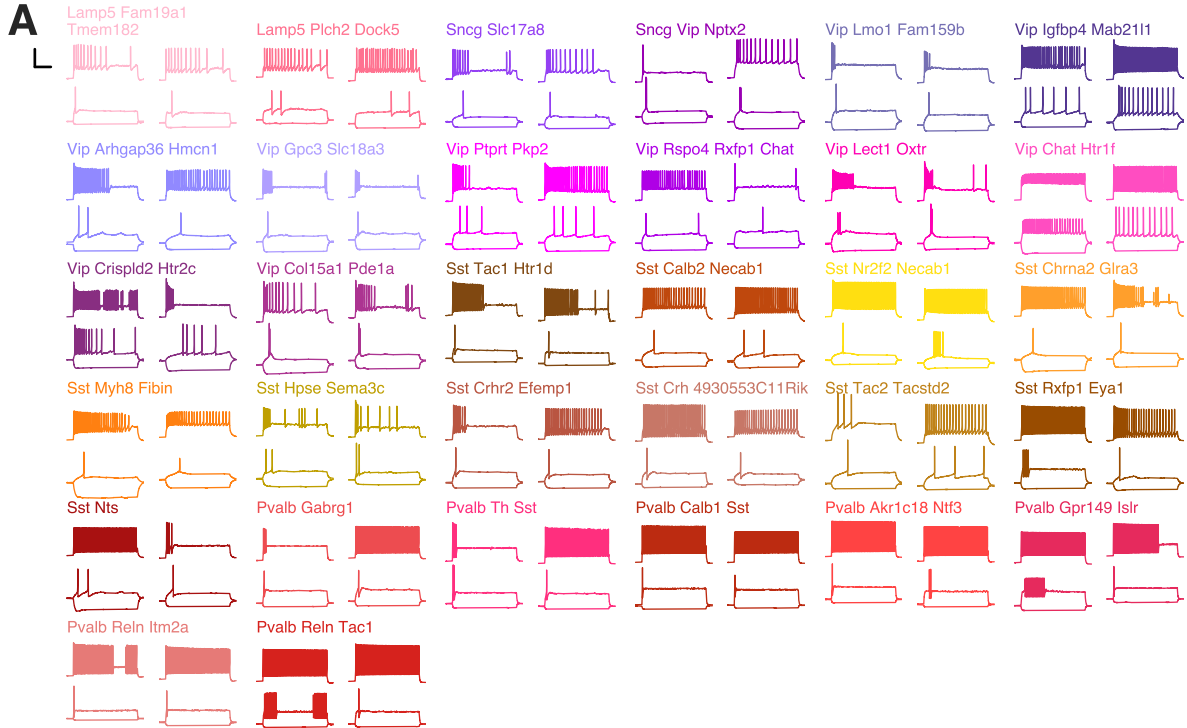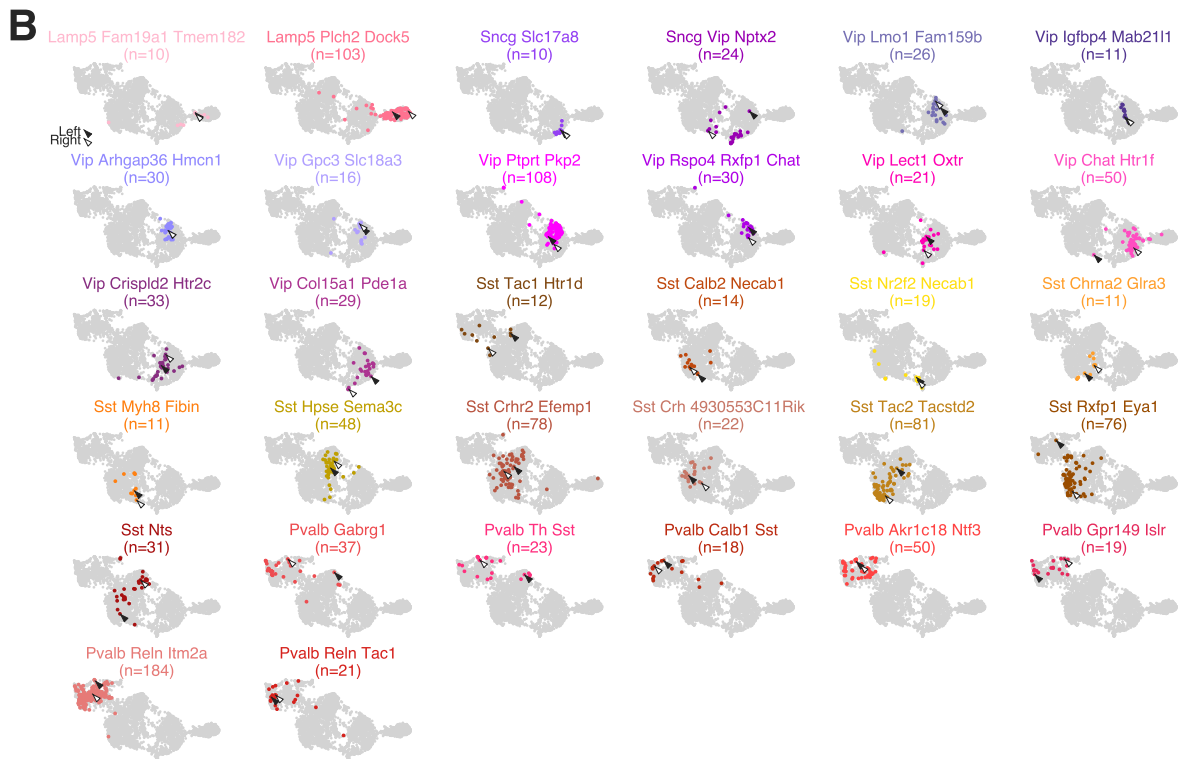

Supplement: NIHMS1640606-supplement-3.pdf [file NIHMS1640606-supplement-3.pdf]

$\square \geq 0.05$  $\square \geq 0.001$ **A**

electrophysiology (lower) and morphology (upper)

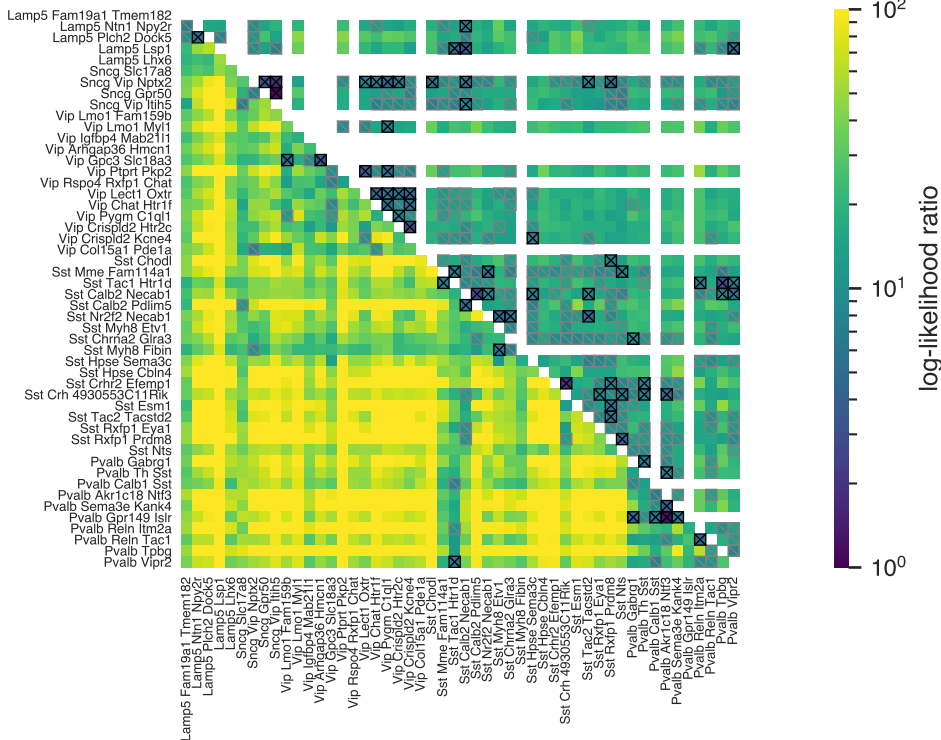**B**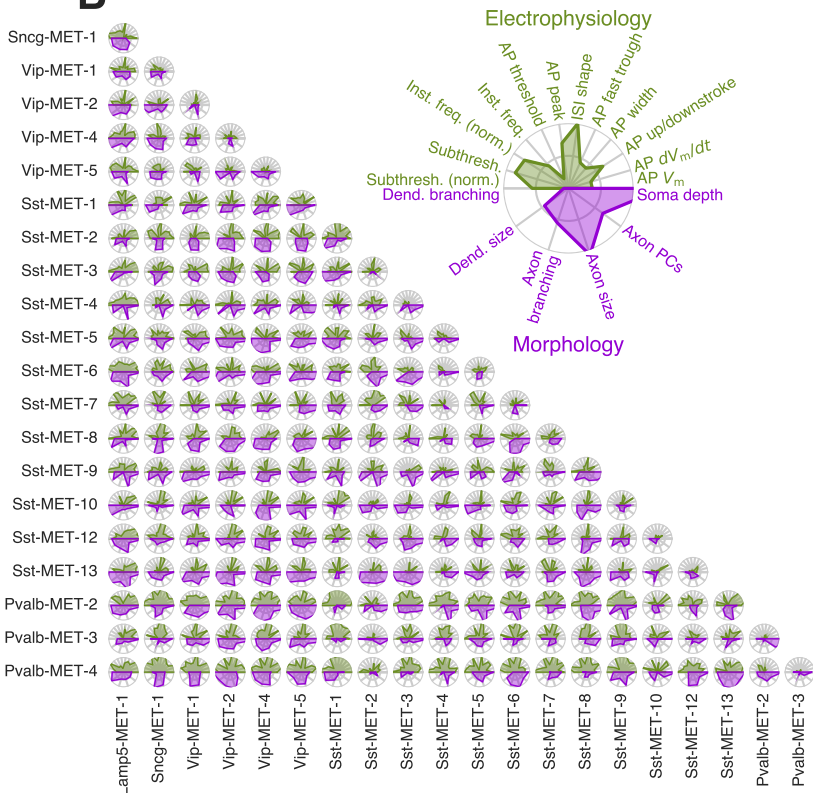

Supplement: NIHMS1640606-supplement-4.pdf [file NIHMS1640606-supplement-4.pdf]

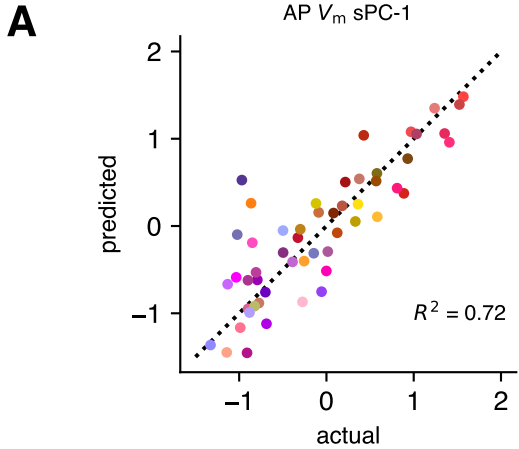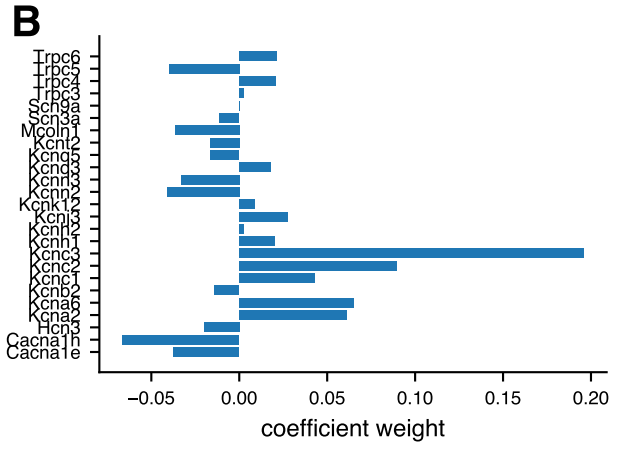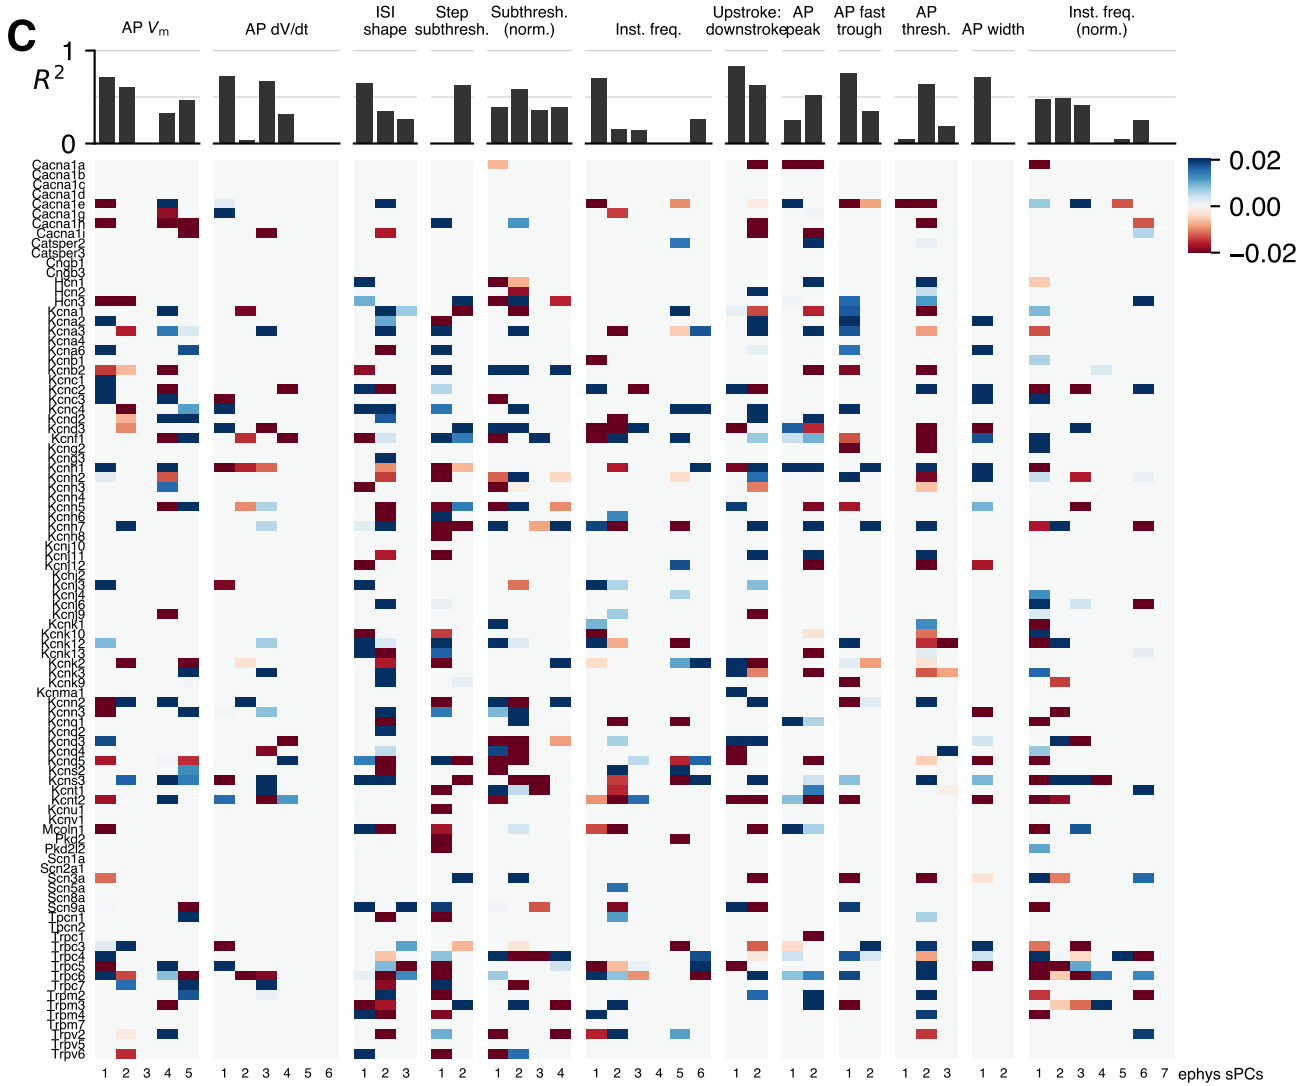

Supplement: NIHMS1640606-supplement-5.pdf [file NIHMS1640606-supplement-5.pdf]
